# Supplementary material for: Rationally designed multifunctional hyperbranched polymer as a trace additive for stable zinc anodes
Source: Royal Society of Chemistry journal article supplement (doi:10.1039/d5ta07914d), 2025-12-02
Supplement: d5ta07914d1.pdf [file d5ta07914d1.pdf]

## Supporting information

### **Rationally designed multifunctional hyperbranched polymer as a trace additive for stable zinc anodes**

*Jiekai Hong<sup>a</sup>, Zumin Chen<sup>a</sup>, Xun Li<sup>a</sup>, Kai Feng<sup>b</sup>, and Jiye Luo<sup>a\*</sup>*

---

a J. Hong, Z. Chen, X. Li, Dr. J. Luo  
School of Chemical Engineering and Light Industry  
Guangdong University of Technology  
Guangzhou 510006, China  
E-mail: [luojiye@gdut.edu.cn](mailto:luojiye@gdut.edu.cn)

b Dr. K. Feng  
College of Chemistry & Engineering  
Yantai University  
Yantai 264005, China

## Experimental section

### Electrolyte and synthesis

**Preparation of electrolyte:** 2 M  $\text{ZnSO}_4$  electrolyte was prepared using  $\text{ZnSO}_4 \cdot 7\text{H}_2\text{O}$  and ultrapure water. Different amounts of N-HPG ( $M_n=2150$ ) were added to the 2 M  $\text{ZnSO}_4$  electrolyte to prepare electrolytes containing N-HPG at different concentrations. Full cell electrolytes were prepared in a similar way using 2 M  $\text{ZnSO}_4$  + 0.2 M  $\text{MnSO}_4$  salt as the base salt.  $\text{ZnSO}_4 \cdot 7\text{H}_2\text{O}$  and  $\text{MnSO}_4 \cdot \text{H}_2\text{O}$  were purchased from Aladdin Reagent Company and were used without any purification.

**Synthesis of N-HPG:** 224.4 mg of potassium tert-butoxide was loaded in a reaction flask under a nitrogen atmosphere. Subsequently, 758.15 mg of trimethyl epoxypropyl ammonium chloride in 0.5 mL of dimethyl sulfoxide was added into the flask. The mixture was heated to 60 °C with continuous stirring. Next, 3.704 g of 2,3-epoxypropanol was slowly injected into the flask, then the temperature was gradually increased to 120°C and kept for 24 h. After the reaction, the solvent was removed by vacuum evaporation and the hyperbranched polymer was obtained as a brown paste, which was used without further purification.

**Synthesis of manganese dioxide:** 2.37 g  $\text{KMnO}_4$ , 3.33 g  $\text{MnSO}_4$  and 50 ml of deionized water were added in a 150 ml round-bottom flask. The mixture was stirred at room temperature to ensure thorough mixing. Subsequently, 10 mL of 6 mol/L nitric acid was added dropwisely. After the addition of nitric acid, the mixture was heated to 100°C and vigorous stirred for 24 hours. After the reaction, the product was filtered, washed with deionized water to neutral, and dried to yield a gray powder, which was identified as  $\alpha\text{-MnO}_2$ . The SEM and XRD characterization results for  $\text{MnO}_2$  are presented in Figures S19 and S20, respectively.

### Material characterization

SEM measurements were conducted using a Phenom Prox microscope to characterize the morphology of the samples. The Raman spectroscopy was performed using a HORIBA Jobin Yvon LabRAM HR800 instrument with a laser wavelength of 633 nm. X-ray diffraction (XRD) analysis was conducted using a Rigaku SmartLab instrument with a scanning rate of 10°/min.

### Electrochemical characterization

**Interface morphology observation:** The morphological changes at the zinc electrode interface during galvanization at a current density of 5 mA  $\text{cm}^{-2}$  were observed using a customized in-situ optical microscope integrated with a GAOPIN GP-300C commercial camera, which provides real-time visual data of the electrode surface.

**Hydrogen evolution reaction (HER) tests:** HER reactions were systematically evaluated using an electrochemical

workstation (CHI 760e) equipped with a three-electrode system, in which a platinum sheet, a graphite electrode, and a mercury/mercurous sulfate electrode (MSE) were used as the working, counter, and reference electrode, respectively.

**Oxygen evolution reaction (OER) assessments:** OER measurements were performed on a Zn//SS half-cell with the potential scanning from the open-circuit potential to the positive polarization limit at a scan rate of  $1 \text{ mV s}^{-1}$ .

**Chronoamperometry (CA) measurements:** CA measurements were performed using an electrochemical workstation (CHI 760e) with Zn foils ( $1 \text{ cm} \times 1 \text{ cm}$ ) as the working and counter electrodes, respectively, and a MSE electrode as the reference electrode. The measurements were carried out at an overpotential of  $-150 \text{ mV}$  with a period of  $3600 \text{ s}$ .

**Scanning electrochemical microscopy (SECM) characterization:** SECM scans were performed using a CHI 920d instrument with a constant voltage mode.

**Electrochemical impedance spectroscopy (EIS):** The impedance of Zn//Zn symmetric cells containing different electrolytes were measured using a DH7000C (DONGHUA) electrochemical workstation. The testing frequency range was  $100 \text{ kHz}$  to  $0.1 \text{ Hz}$ , with an AC voltage amplitude of  $10 \text{ mV}$ .

**Ionic conductivity tests:** The ionic conductivities of the electrolytes were measured at room temperature using the EIS method. SS//SS symmetric cells were used and the measurements were carried out on an Autolab PGSTAT302N instrument.

**Galvanostatic measurements (GMs) :** GMs were carried out using an electrochemical workstation (CHI 760e) with a three-electrode system. A platinum rotating disk electrode (Pt-RDE, PINE) with a diameter of  $5 \text{ mm}$  was employed as the working electrode. The counter electrode and the reference electrode were Zn bar and saturated mercury-mercurous sulfate electrode (SMSE), respectively. The volume of the electroplating solution was  $50 \text{ ml}$  and the temperature was controlled at  $25^\circ\text{C}$ . Before the GMs, a thin Zn layer was deposited on the Pt-RDE ( $10 \text{ mA cm}^{-2}$ ,  $600 \text{ s}$ ) in the base electroplating solution to prepare a Zinc Rotating Disc (Zn-RDE). The GMs were carried out with the current density of  $1 \text{ mA cm}^{-2}$ . The rotating speed of the working electrode was controlled at  $100 \text{ rpm}$  or  $1000 \text{ rpm}$  to simulate the forced convection at zinc tips and zinc surfaces, respectively. At intervals of  $600 \text{ seconds}$ ,  $1200 \text{ seconds}$ , and  $1800 \text{ seconds}$ , certain amount of N-HPG were introduced correspondingly and the potentials were continuously collected throughout the experimental procedure.

## **Battery testing**

**Cathode preparation:** The cathodes were prepared by mixing the active material ( $\text{MnO}_2$ ), conductive carbon black (Super P), and binder (PVDF) in a mass ratio of  $7:2:1$  using N-methyl-2 pyrrolidone (NMP) as the solvent. Then the resulting slurry was coated onto the carbon cloth ( $12 \text{ mm}$  in diameter) with an  $\text{MnO}_2$  loading of  $0.8\text{--}1.2 \text{ mg cm}^{-2}$ . The coated current

collectors were dried in a vacuum oven at 80°C for 12 hours.

**Battery testing:** The Zn//Zn, Zn//Cu, and Zn//MnO<sub>2</sub> batteries were assembled and tested in CR2025 coin-type cells under air atmosphere. Glass fiber separator (Whatman, GF/D) was used, the zinc foil thickness was 100 μm, and the electrolyte volume was 150 μL. Galvanostatic charge-discharge (GCD) testing and rate capability evaluation were performed using a LAND battery testing system.

### DFT calculations and MD simulations

Density functional theory (DFT) calculations were carried out using the Quantum Espresso package,<sup>1</sup> employing the Perdew-Burke-Ernzerhof (PBE) parameterization,<sup>2,3</sup> for the exchange correlation functional within the generalized gradient approximation (GGA). Vanderbilt ultra-soft pseudopotentials were utilized, with electronic wave functions expanded in plane-waves using a kinetic energy cutoff of 30 Ry. Among densely packed zinc surfaces, the Zn (002) surface was identified as the most stable.<sup>4</sup> To model the surface, periodic supercells were employed, featuring an iron slab of 11×11 in-plane size to prevent interaction with periodic replicas of N-HPG, along with a 20 Å thick vacuum region. Brillouin zone sampling utilized a 2×2×1 Monkhorst Pack grid. For the zinc dendrite model, Wulff constructions (dominated by (101) and (100) surfaces) with an 8-layer stacked mode were employed. A N-HPG molecule was adsorbed on the two Zn substrates in their most stable configuration, and the system was relaxed under either a 0 eV/Å or 0.05 eV/Å electrostatic field.

Molecular dynamics (MD) simulations were performed using the large-scale atomic/molecular parallel simulator (LAMMPS) package.<sup>5</sup> Simulations included pure ZnSO<sub>4</sub> solution and a mixed sample of ZnSO<sub>4</sub> and N-HPG additive. The simulated box dimensions were 4.45×4.45×4.45 nm<sup>3</sup> with periodic boundary conditions, containing 130 ZnSO<sub>4</sub> and 2950 water molecules, and 130 ZnSO<sub>4</sub>, 3 N-HPG, and 2872 H<sub>2</sub>O molecules, respectively. The cell structure was constructed with PACKMOL software.<sup>6</sup> The force field of water molecules was modeled by SPC/E. The general Amber force field (GAFF)<sup>7</sup> was used to describe the N-HPG and SO<sub>4</sub><sup>2-</sup> ions, Zn<sup>2+</sup> parameters were taken from the work by Babu *et al.*<sup>8</sup> The annealing simulation from 798 K to 298 K was applied to our systems to speed up the energy relaxation. Subsequently, molecular dynamics simulations under NPT ensemble at 298 K and 1 atm were performed for 10 ns for each system. Based on the structure obtained from the previous step, the system was further relaxed at 298 K in the NVT ensemble for 10 ns to obtain the equilibrium structure. The data for the last 5 ns were used for analyses. The Nosé-Hoover thermostat<sup>9</sup> and the extended Lagrangian approach<sup>10</sup> were applied to control the temperature and pressure, respectively. After completing MD simulations, the radial distribution function was analyzed. A solvation structure of Zn<sup>2+</sup> from output stable structure was extracted for calculating binding energy between Zn<sup>2+</sup> and solvation molecules.



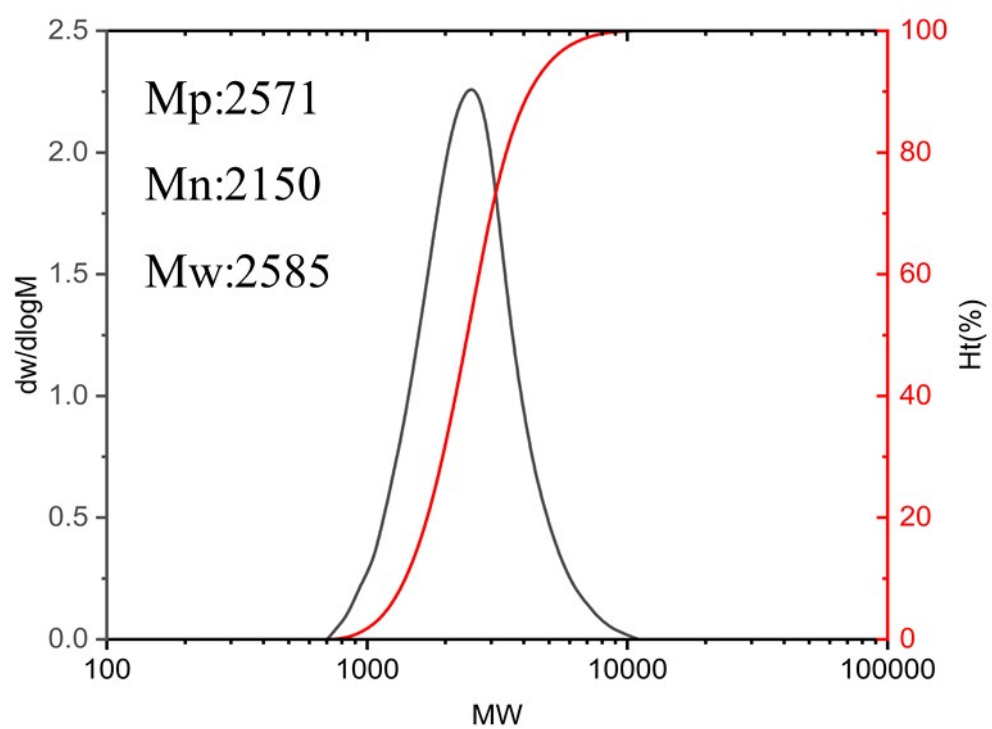

Fig. S1 GPC Data of N-HPG

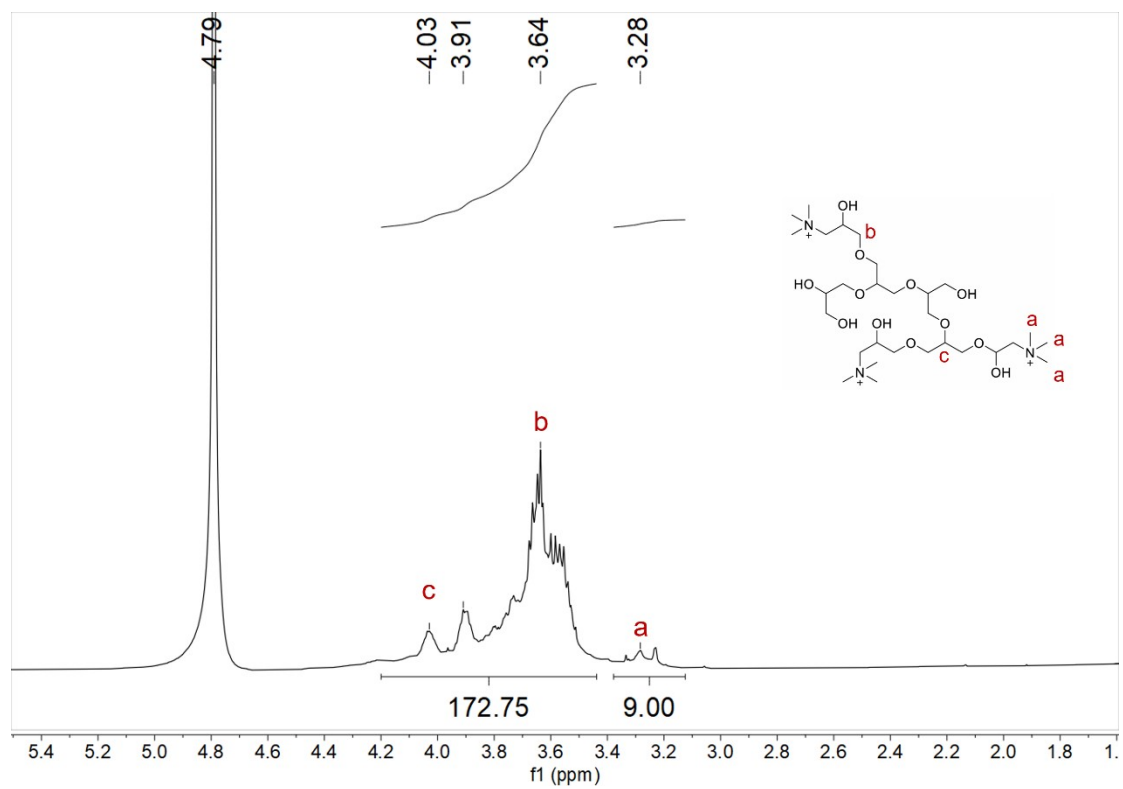

**Fig. S2**  $^1\text{H}$  NMR ( $\text{D}_2\text{O}$ , 400 MHz) spectra of N-HPG

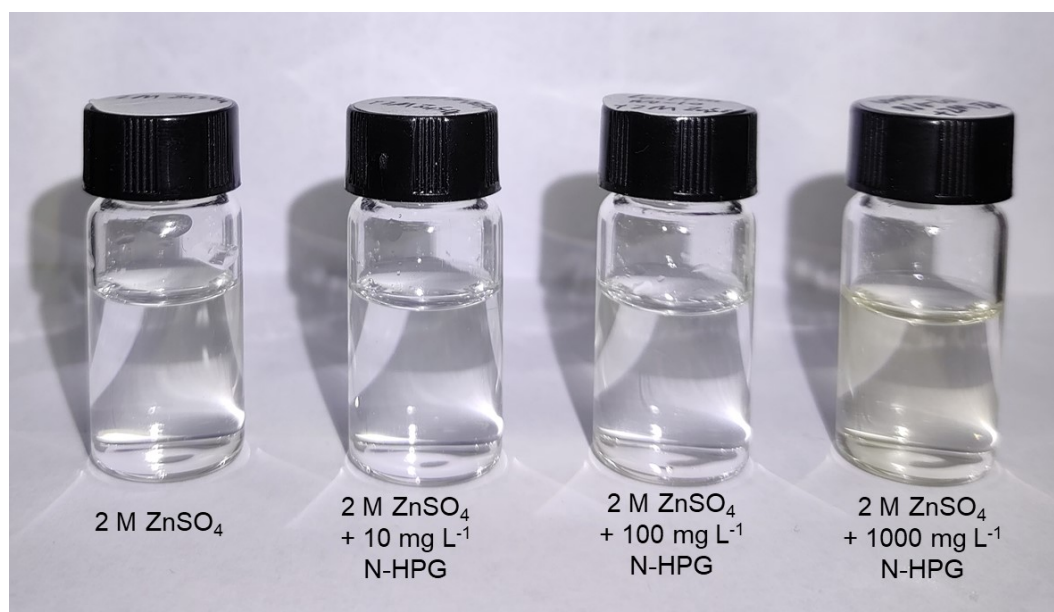

**Fig. S3** Optical pictures of N-HPG electrolyte at different concentrations.

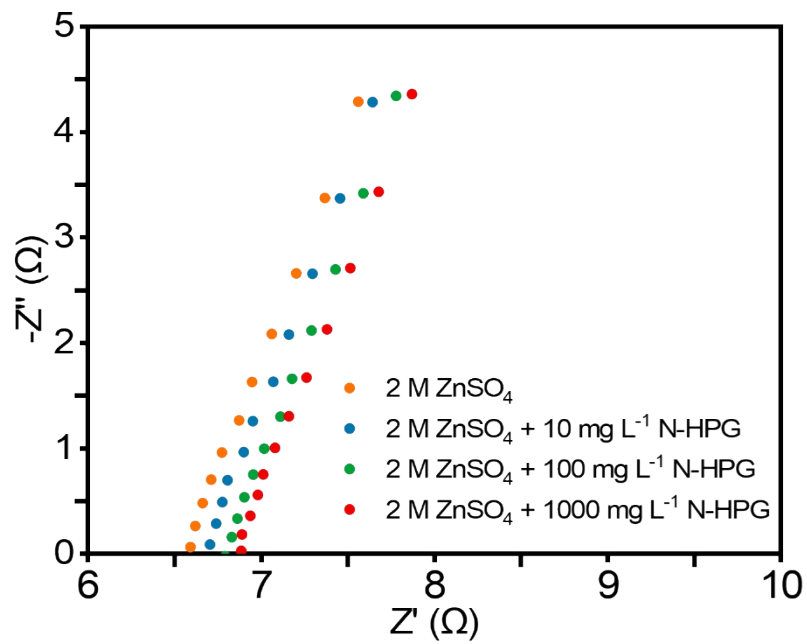

Fig. S4 Magnified high-frequency region of EIS spectra for SS//SS symmetric cells employing various electrolytes

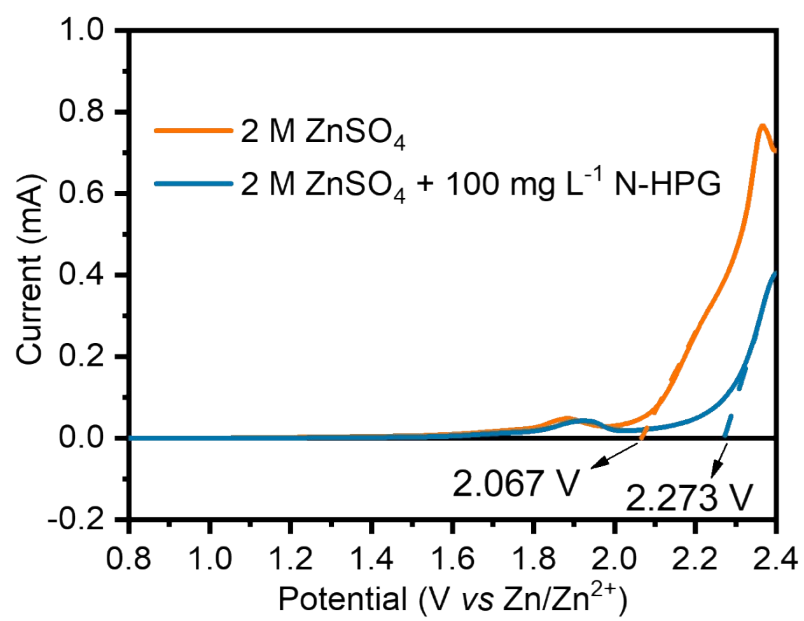

**Fig. S5** Oxygen evolution reaction curves in electrolytes with or without N-HPG.

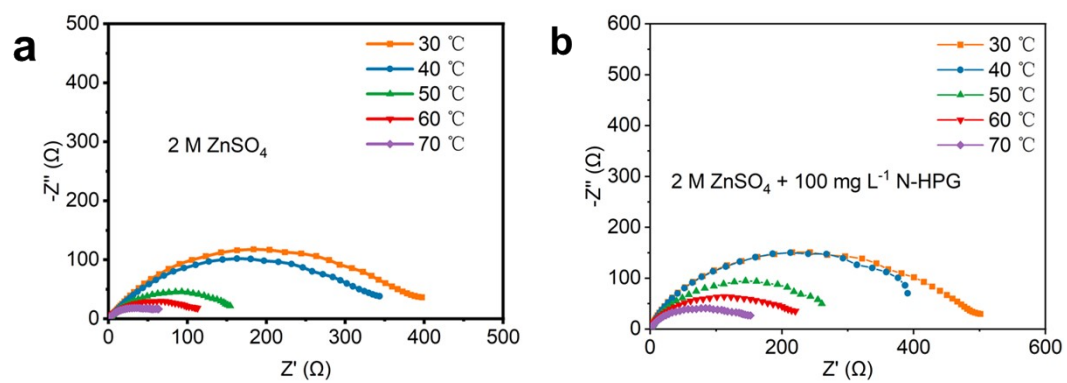

**Fig. S6** EIS impedance diagram of (a) 2 M ZnSO<sub>4</sub> and (b) 2 M ZnSO<sub>4</sub> + 100 mg L<sup>-1</sup> N-HPG at different temperatures.

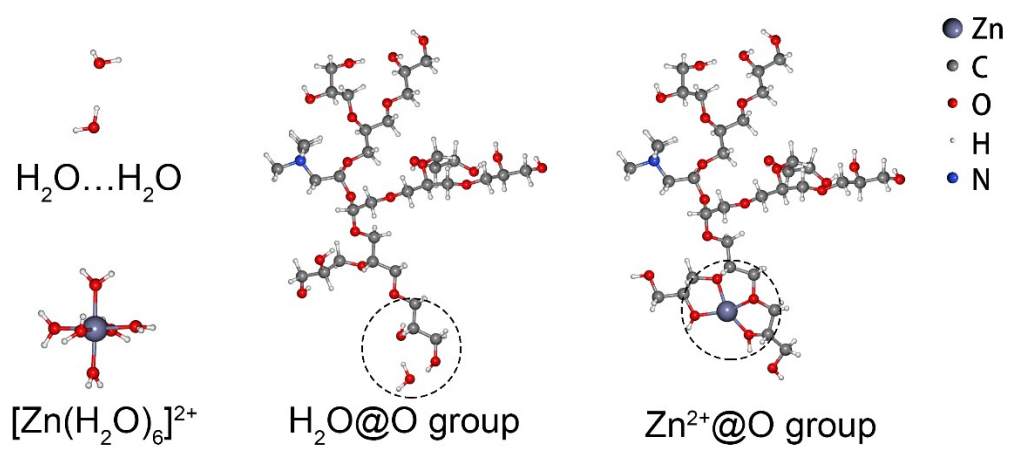

**Fig. S7** The schematic illustration of  $\text{H}_2\text{O}-\text{H}_2\text{O}$ ,  $\text{Zn}^{2+}-\text{H}_2\text{O}$ ,  $\text{H}_2\text{O}-\text{O}$  groups and  $\text{Zn}^{2+}-\text{O}$  groups.

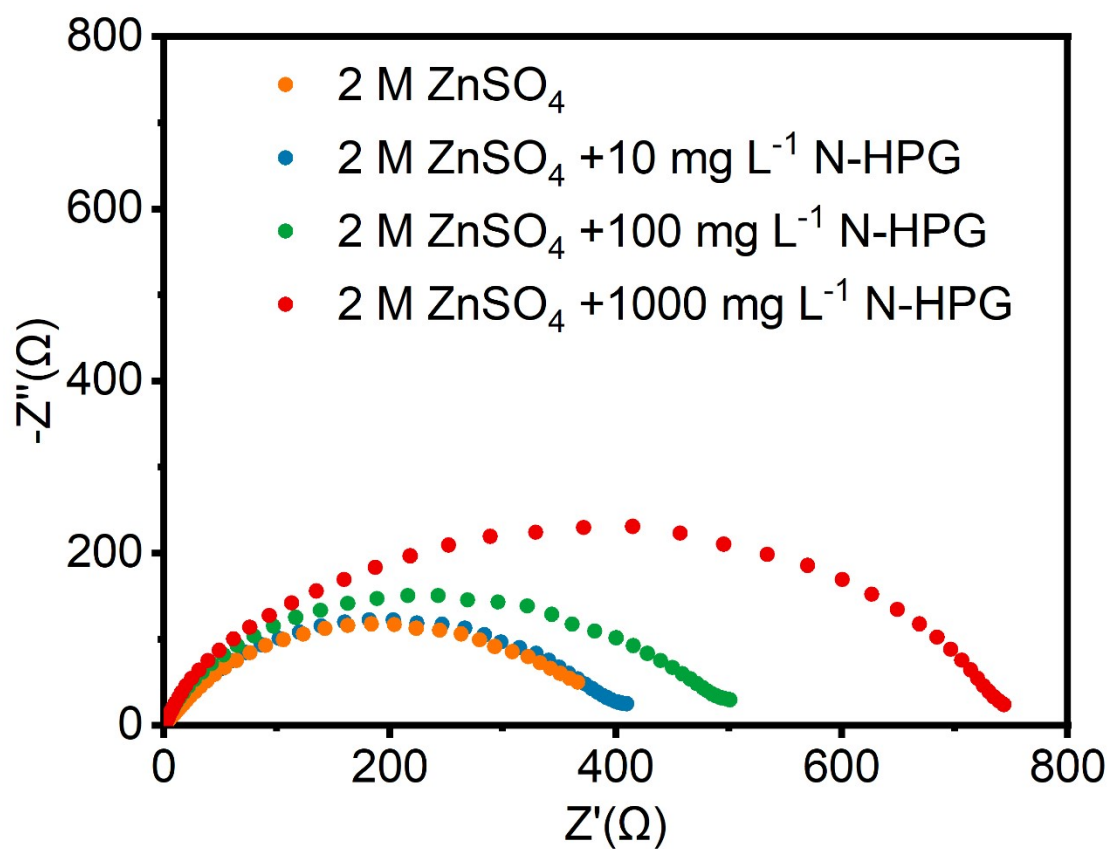

**Fig. S8** Nyquist diagram of Zn//Zn symmetric cell in 2 M  $\text{ZnSO}_4$  with different concentrations of N-HPG.

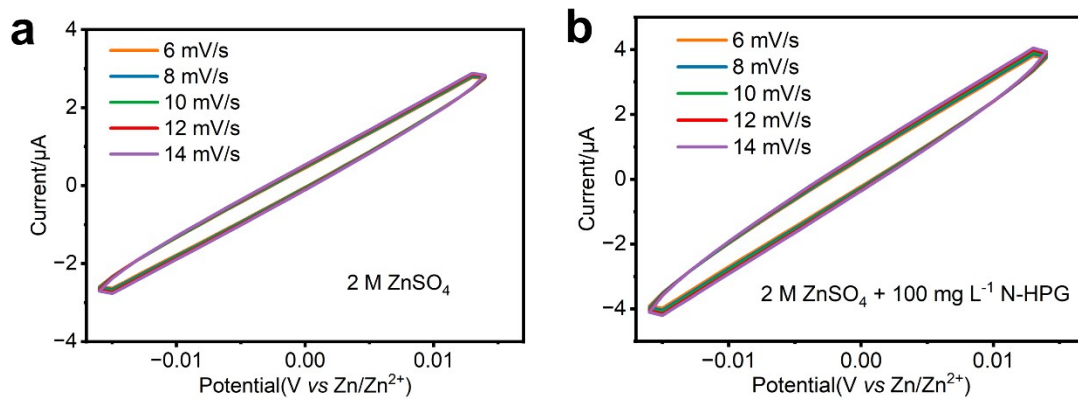

**Fig. S9** CV curves of Zn//Zn batteries at different sweep rates in (a) 2 M ZnSO<sub>4</sub> and (b) 2 M ZnSO<sub>4</sub> + 100 mg L<sup>-1</sup> N-HPG electrolytes.

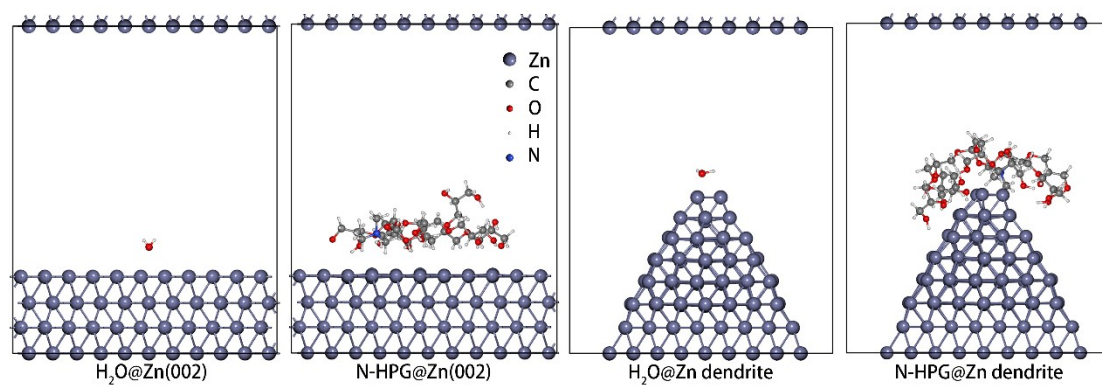

**Fig. S10** Under electric field: adsorption configuration of  $\text{H}_2\text{O}$ /N-HPG on the Zn (002) crystal plane and Zn tip.

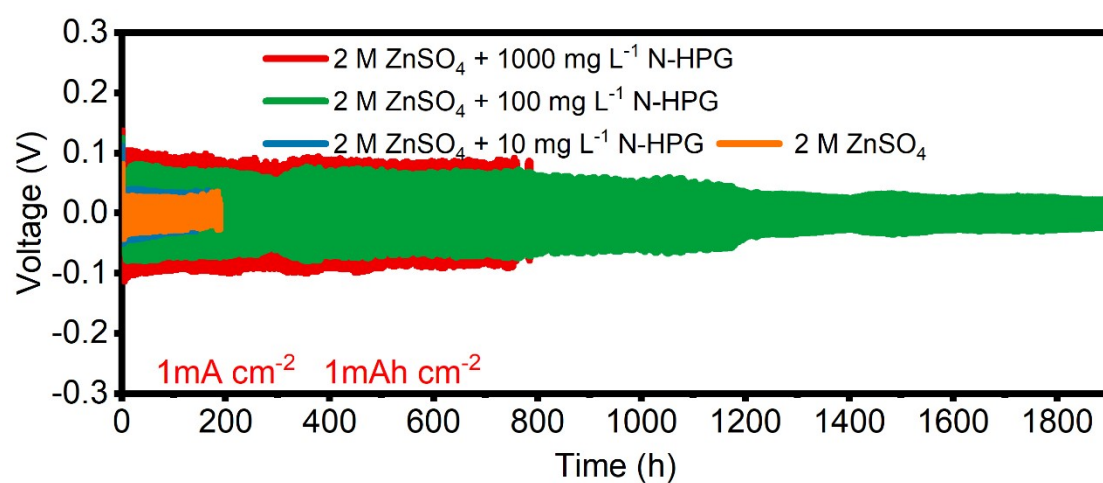

Fig. S11 Long cycle performance of Zn//Zn symmetric cells with different concentrations of N-HPG (1 mA cm<sup>-2</sup>, 1 mAh cm<sup>-2</sup>).

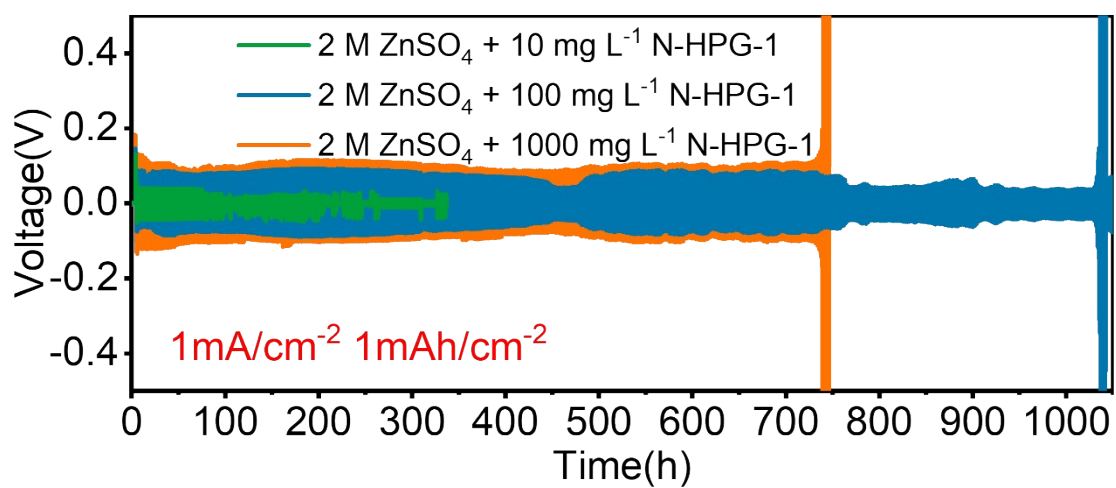

**Fig. S12** Long cycle performance of Zn//Zn symmetric cells with different concentrations of N-HPG-1 (1 mA cm<sup>-2</sup>, 1 mAh cm<sup>-2</sup>). The additive N-HPG-1 was synthesized by reacting trimethyl epoxypropyl ammonium chloride with 2,3-epoxypropanol at a 1:1 molar ratio, followed by electrochemical testing at varying concentrations in Zn//Zn symmetric cells.

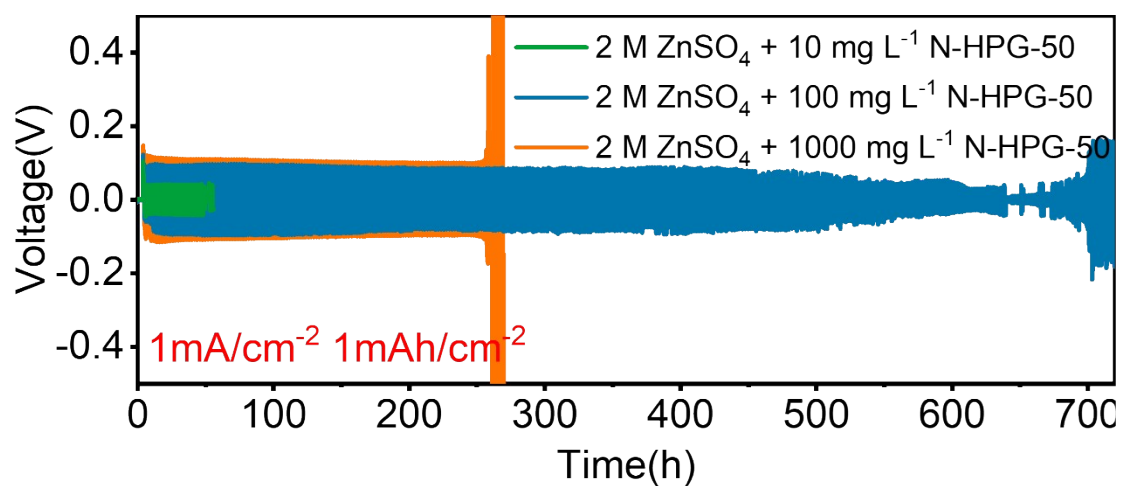

**Fig. S13** Long cycle performance of Zn//Zn symmetric cells with different concentrations of N-HPG-50 ( $1 \text{ mA cm}^{-2}$ ,  $1 \text{ mAh cm}^{-2}$ ). The additive N-HPG-50 was synthesized by reacting trimethyl epoxypropyl ammonium chloride with 2,3-epoxypropanol at a 1:50 molar ratio, followed by electrochemical testing at varying concentrations in Zn//Zn symmetric cells.

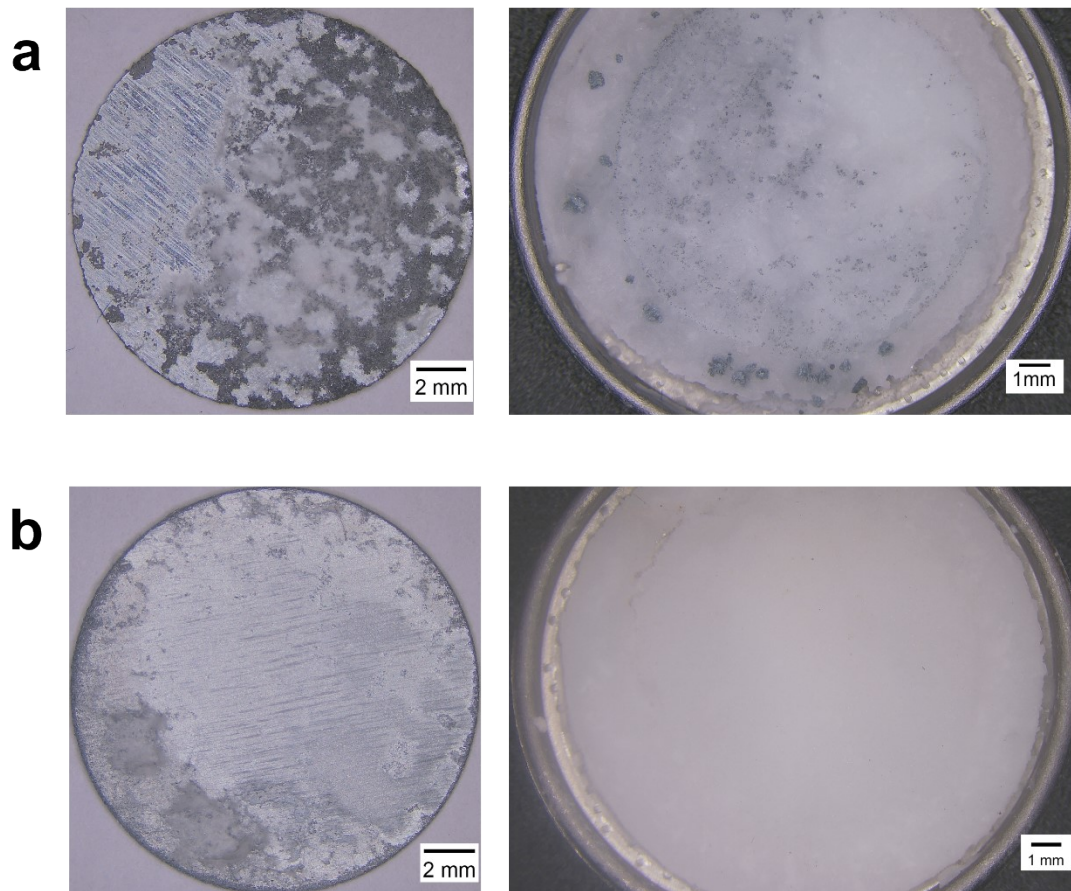

**Fig. S14** (a) Optical images of Zn foil (left) and separator (right) after 100 cycles of Zn//Zn symmetric cell cycling in 2 M ZnSO<sub>4</sub> electrolyte; (b) Optical images of zinc foil (left) and separator (right) after 100 cycles of Zn//Zn symmetric cell cycling in 2 M ZnSO<sub>4</sub> + 100 mg L<sup>-1</sup> N-HPG electrolyte.

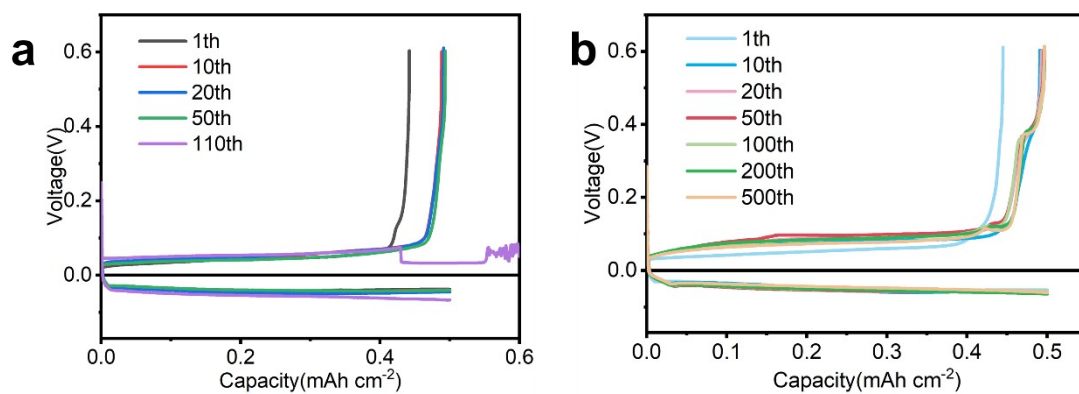

**Fig. S15** Corresponding voltage distributions of Zn//Cu cells at different cycles in (a) 2 M ZnSO<sub>4</sub> electrolyte and (b) 2 M ZnSO<sub>4</sub> + 100 mg L<sup>-1</sup> N-HPG electrolyte.

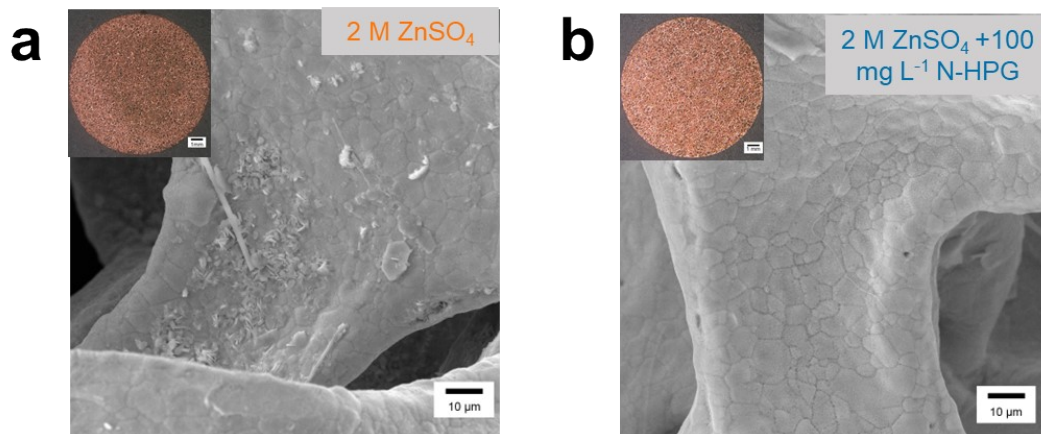

**Fig. S16** SEM images of Cu foils after cycling for 100 h in (a) 2 M ZnSO<sub>4</sub> and (b) 2 M ZnSO<sub>4</sub> + 100 mg L<sup>-1</sup> N-HPG (Illustrations are optical pictures)

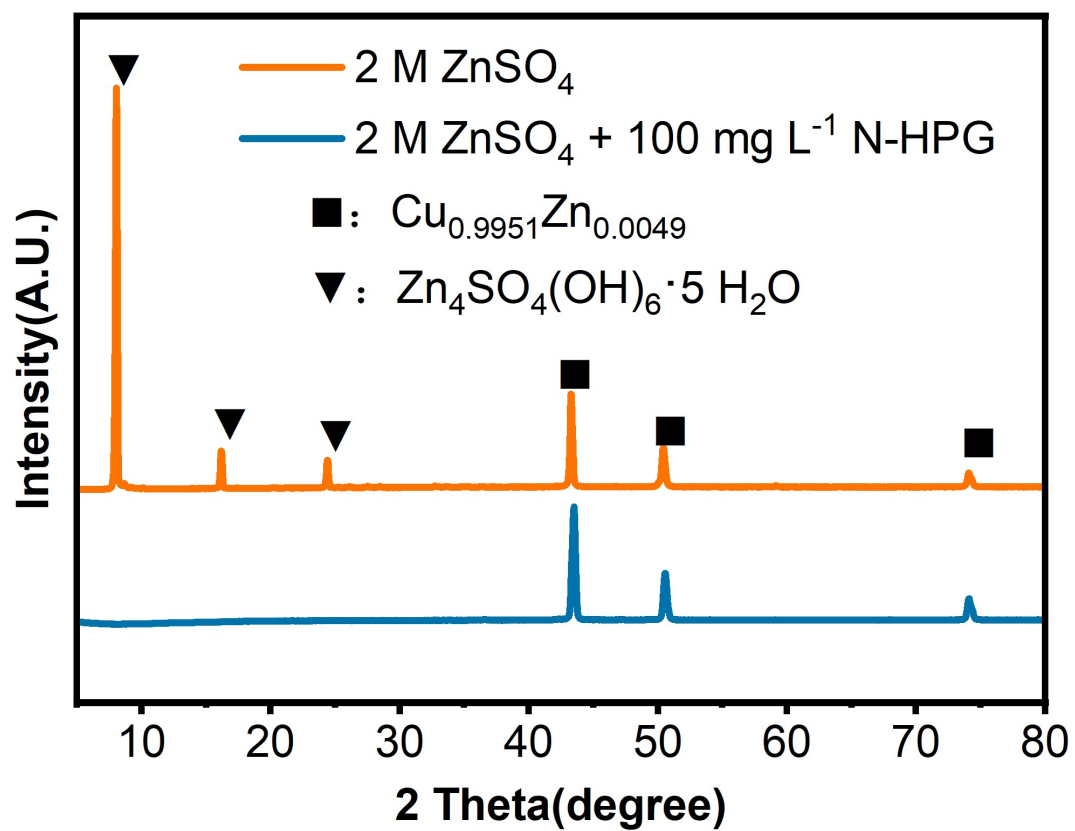

Fig. S17 XRD image of copper foil after 100 h of cycling.

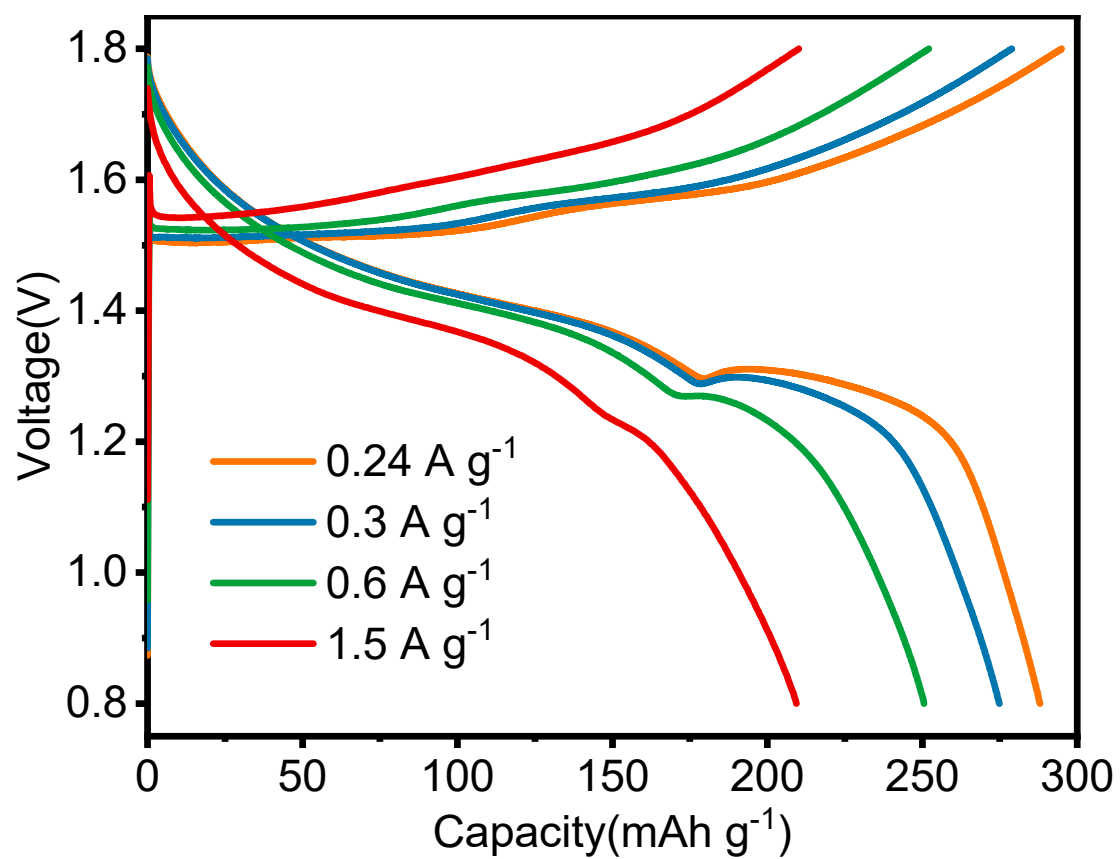

**Fig. S18** Voltage-capacity curves for N-HPG containing electrolyte at different current densities

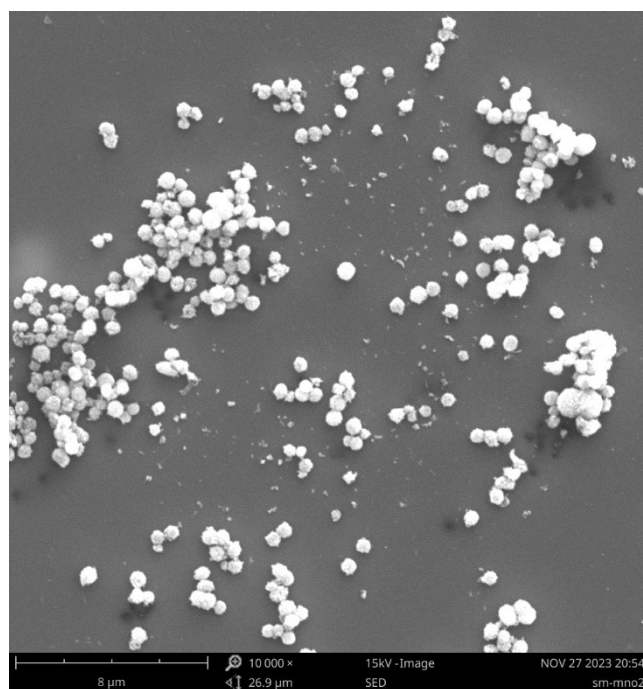

Fig. S19 SEM image of manganese dioxide.

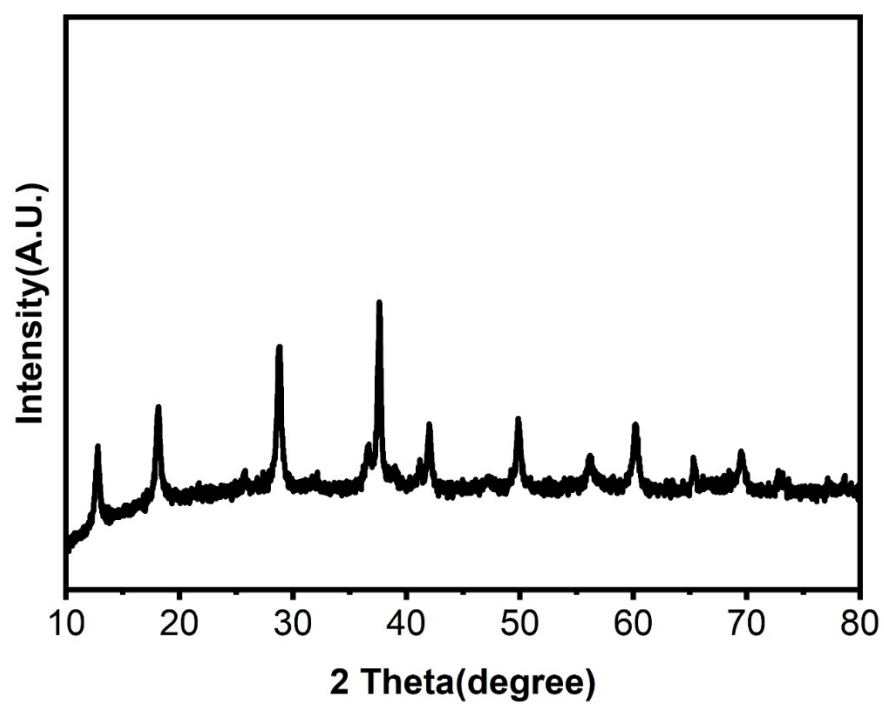

Fig. S20 XRD image of manganese dioxide.

## References

- 1 P. Giannozzi, S. Baroni, N. Bonini, M. Calandra, R. Car, C. Cavazzoni, D. Ceresoli, G. L. Chiarotti, M. Cococcioni and I. Dabo, *J. Phys.: Condens. Matter*, 2009, **21**, 395502.
- 2 J. P. Perdew, K. Burke and M. Ernzerhof, *Phys. Rev. Lett.*, 1996, **77**, 3865-3868.
- 3 G. Kresse and D. Joubert, *Physical Review B*, 1999, **59**, 1758-1775.
- 4 R. Tran, Z. Xu, B. Radhakrishnan, D. Winston, W. Sun, K. A. Persson and S. P. Ong, *Sci. Data*, 2016, **3**, 160080.
- 5 S. Plimpton, *J. Comput. Phys.*, 1995, **117**, 1-19.
- 6 S. Schott-Verdugo and H. Gohlke, *Journal of Chemical Information and Modeling*, 2019, **59**, 2522-2528.
- 7 J. M. Wang, R. M. Wolf, J. W. Caldwell, P. A. Kollman and D. A. Case, *J. Comput. Chem.*, 2004, **25**, 1157-1174.
- 8 C. S. Babu and C. Lim, *J. Phys. Chem. A*, 2006, **110**, 691-699.
- 9 W. G. Hoover, *Physical review A*, 1985, **31**, 1695.
- 10 W. Shinoda, M. Shiga and M. Mikami, *Physical Review B*, 2004, **69**, 134103.
